# Supplementary material for: Neural excitability and sensory input determine intensity perception with opposing directions in initial cortical responses
Source: eLife journal article supplement (doi:10.7554/elife.67838), 2021-09-30
Supplement: fig2-data1 [file elife-67838-fig2-data1-v1.pdf]

---

|                    | N20: most negative 20% | N20: least negative 20% |
|--------------------|------------------------|-------------------------|
| Alpha: lowest 20%  | 19.45%                 | 21.33%                  |
| Alpha: highest 20% | 21.16%                 | 18.83%                  |

---
